# Supplementary material for: Methylation Drivers and Prognostic Implications in Sinonasal Poorly Differentiated Carcinomas
Source: MDPI journal article supplement (doi:10.3390/cancers13195030), 2021-10-08
Supplement: s1 [file s1]

**Table S1.** Comprehensive clinical, histological, immunohistochemical and molecular features of 53 poorly differentiated epithelial sinonasal tumors.

|       |     |        |                |     |                   | TNM STAGE |    |   |                     |                     |                    |         |        |            |                             |                                               |                      |               |                         |                |                                       |                   |  |
|-------|-----|--------|----------------|-----|-------------------|-----------|----|---|---------------------|---------------------|--------------------|---------|--------|------------|-----------------------------|-----------------------------------------------|----------------------|---------------|-------------------------|----------------|---------------------------------------|-------------------|--|
| ID    | Age | Gender | Site of origin | -   | Revised Diagnosis | T         | N  | M | INI1 IHC (SMAR CB1) | BRG1 IHC (SMAR CA4) | BRM IHC (SMAR CA2) | p53 IHC | Rb IHC | ARID1A IHC | LINE1 methylation level (%) | SALSA MLPA P258 (SMARCB1)                     | IDH2 exon 4 mutation | NGS re- sults | Professional exposition | Smoking habits | DSS (Dis- ease Spe- cific Sur- vival) | DSS time (months) |  |
| 25SCC | 80  | f      | e              | SCC | KSCC              | 4b        | 0  | 0 | +                   | +                   | +                  | +       | -      | +          | 29.1                        | wt                                            | wt                   | wt            | 1                       | 0              | 0                                     | 53                |  |
| 11SCC | 57  | f      | mx             | SCC | KSCC              | 3         | 0  | 0 | +                   | +                   | +                  | na      | na     | +          | 39.9                        | wt                                            | wt                   | na            | 1                       | 0              | 1                                     | 105               |  |
| 33SCC | 69  | f      | e              | SCC | KSCC              | 3         | 3b | 0 | +                   | +                   | +                  | +       | +      | +          | 48.9                        | wt                                            | wt                   | MUT           | 0                       | 1              | na                                    | na                |  |
| 9SCC  | 70  | f      | e              | SCC | KSCC              | 4b        | 0  | 0 | +                   | +                   | +                  | +++     | -      | +          | 51.5                        | wt                                            | wt                   | MUT           | 0                       | 1              | 1                                     | 6                 |  |
| 27SCC | 46  | f      | e              | SCC | KSCC              | 3         | 0  | 0 | +                   | +                   | +                  | +++     | +      | +          | 55.0                        | wt                                            | wt                   | MUT           | 0                       | 0              | 0                                     | 46                |  |
| 1SCC  | 46  | f      | e              | SCC | KSCC              | 4a        | 0  | 0 | -                   | /                   | /                  | -       | -      | +          | 65.3                        | BIALLELIC LOSS SMARCB1                        | wt                   | na            | 0                       | 0              | 0                                     | 149               |  |
| 7SCC  | 57  | f      | s              | SCC | KSCC              | 4a        | 0  | 0 | +                   | +                   | +                  | +       | +      | +          | 70.2                        | wt                                            | wt                   | na            | 1                       | 0              | 0                                     | 124               |  |
| 19SCC | 59  | f      | mx             | SCC | KSCC              | 2         | 0  | 0 | +                   | +                   | +                  | +       | -      | na         | na                          | na                                            | na                   | na            | 1                       | 1              | 1                                     | 77                |  |
| 29SCC | 86  | m      | mx             | SCC | KSCC              | 4b        | 0  | 0 | +                   | +                   | +                  | +       | +      | +          | 22.2                        | wt                                            | wt                   | wt            | 1                       | 0              | 1                                     | 13                |  |
| 6SCC  | 65  | m      | e              | SCC | KSCC              | 4b        | 0  | 0 | +                   | +                   | +                  | -       | -      | +          | 33.4                        | wt                                            | wt                   | MUT           | 1                       | 1              | 0                                     | 128               |  |
| 30SCC | 67  | m      | mx             | SCC | KSCC              | 4a        | 0  | 0 | +                   | +                   | +                  | -       | -      | +          | 47.9                        | wt                                            | wt                   | MUT           | 1                       | 1              | 1                                     | 14                |  |
| 20SCC | 79  | m      | mx             | SCC | KSCC              | 3         | 0  | 0 | +                   | +                   | +                  | -       | +      | +          | 51.1                        | wt                                            | wt                   | MUT           | 1                       | 0              | 0                                     | 66                |  |
| 18SCC | 63  | m      | mx             | SCC | KSCC              | 4a        | 0  | 0 | +                   | +                   | +                  | +       | -      | +          | 54.1                        | wt                                            | wt                   | na            | 0                       | 1              | 1                                     | 35                |  |
| 4SCC  | 40  | m      | e              | SCC | KSCC              | 4b        | 0  | 0 | +                   | +                   | +                  | +       | -      | +          | 65.4                        | na                                            | wt                   | na            | 0                       | 0              | 0                                     | 198               |  |
| 15SCC | 45  | m      | e              | SCC | KSCC              | 4a        | 0  | 0 | +                   | +                   | +                  | -       | +      | na         | 71.7                        | wt                                            | wt                   | na            | 0                       | 0              | 0                                     | 103               |  |
| 21SCC | 40  | m      | mx             | SCC | KSCC              | 4b        | 0  | 0 | -                   | /                   | /                  | +       | -      | +          | 74.9                        | BIALLELIC LOSS SMARCB1                        | wt                   | wt            | 1                       | 1              | 1                                     | 14                |  |
| 24SCC | 70  | m      | mx             | SCC | KSCC              | 4b        | 0  | 0 | -                   | /                   | /                  | +       | +      | +          | 77.3                        | BIALLELIC LOSS SMARCB1                        | wt                   | wt            | 0                       | 1              | 1                                     | 4                 |  |
| 34SCC | 66  | m      | e              | SCC | KSCC              | 4b        | 0  | 0 | -                   | /                   | /                  | +       | +      | +          | 77.4                        | BIALLELIC LOSS SMARCB1 MONOAL- LELIC LOSS 22q | wt                   | wt            | 1                       | 1              | 1                                     | 11                |  |
| 16SCC | 68  | m      | e              | SCC | KSCC              | 4a        | 0  | 0 | +                   | +                   | +                  | -       | -      | na         | na                          | na                                            | na                   | na            | 1                       | 1              | 1                                     | 15                |  |
| 23SCC | 68  | m      | fr             | SCC | KSCC              | 4a        | 0  | 0 | +                   | +                   | +                  | +++     | +      | na         | na                          | na                                            | na                   | na            | 0                       | 0              | 0                                     | 84                |  |
| 2SCC  | 68  | f      | e              | SCC | KSCC***           | 3         | 0  | 0 | +                   | +                   | +                  | +       | -      | +          | 40.2                        | wt                                            | wt                   | wt            | na                      | 0              | 1                                     | 48                |  |
| 13SCC | 52  | m      | mx             | SCC | KSCC***           | 4a        | 0  | 0 | +                   | +                   | +                  | +       | -      | +          | 51.3                        | wt                                            | wt                   | wt            | 0                       | 1              | 0                                     | 105               |  |
| 22SCC | 55  | m      | e              | SCC | KSCC***           | 2         | 0  | 0 | +                   | +                   | +                  | +       | +      | +          | 61.4                        | wt                                            | wt                   | wt            | 1                       | 1              | 0                                     | 62                |  |
| 5SCC  | 64  | m      | e              | SCC | KSCC***           | 3         | 0  | 0 | +                   | +                   | +                  | -       | -      | +          | 68.4                        | na                                            | na                   | na            | 0                       | 0              | 0                                     | 129               |  |
| 14SCC | 68  | f      | e              | SCC | KSCC****          | 4a        | 0  | 0 | +                   | -                   | +                  | -       | +      | +          | 59.1                        | wt                                            | wt                   | MUT           | 1                       | 1              | 0                                     | 103               |  |
| 26SCC | 78  | m      | mx             | SCC | KSCC****          | 3         | 0  | 0 | +                   | +                   | +                  | +++     | +      | +          | 29.2                        | wt                                            | wt                   | na            | 1                       | 0              | 0                                     | 13                |  |
| 10SCC | 65  | f      | e              | SCC | NKSCC             | 4a        | 0  | 0 | +                   | +                   | +                  | +       | -      | +          | 23.5                        | na                                            | wt                   | wt            | 0                       | 0              | 1                                     | 113               |  |
| 12SCC | 70  | f      | e              | SCC | NKSCC             | 4a        | 0  | 0 | +                   | +                   | +                  | +       | -      | +          | 50.6                        | wt                                            | wt                   | na            | 0                       | 0              | 0                                     | 109               |  |

|           |    |   |    |      |                          |    |    |   |   |   |   |     |    |    |      |                                                                                         |             |     |    |   |    |    |
|-----------|----|---|----|------|--------------------------|----|----|---|---|---|---|-----|----|----|------|-----------------------------------------------------------------------------------------|-------------|-----|----|---|----|----|
| 35SCC     | 42 | f | fr | SCC  | NKSCC                    | 4b | 0  | 0 | - | / | / | -   | -  | +  | 64.7 | na                                                                                      | na          | na  | 0  | 0 | 1  | 41 |
| 28SCC     | 48 | m | mx | SCC  | NKSCC                    | 4b | 0  | 0 | - | / | / | -   | +  | +  | 70.0 | MONOAL-<br>LELIC LOSS<br>22q                                                            | wt          | MUT | 0  | 0 | 1  | 26 |
| 8SCC      | 43 | m | e  | SCC  | NKSCC                    | 2  | 0  | 0 | - | / | / | +   | -  | +  | 75.8 | BIALLELIC<br>LOSS<br>SMARCB1                                                            | wt          | na  | 0  | 0 | 1  | 42 |
| 17SCC     | 76 | m | e  | SCC  | NKSCC                    | 4b | 0  | 0 | - | / | / | +   | +  | +  | 76.7 | BIALLELIC<br>LOSS<br>SMARCB1<br>MONOAL-<br>LELIC LOSS<br>OF SNAP29-<br>GNAZ +<br>SNRPD3 | wt          | wt  | 0  | 0 | 0  | 91 |
| 32SCC     | 67 | m | e  | SCC  | NKSCC                    | 4b | 3b | 0 | + | + | + | +   | +  | na | na   | na                                                                                      | na          | na  | 0  | 1 | 1  | 6  |
| 7NEC      | 54 | f | e  | NEC  | LCNEC                    | 4b | 0  | 0 | + | + | + | +++ | +  | +  | 70.0 | wt                                                                                      | p.Arg172Gly | MUT | 0  | 0 | 1  | 4  |
| 6NEC      | 73 | m | e  | NEC  | LCNEC                    | 4b | 0  | 0 | + | + | + | +++ | +  | +  | 49.2 | wt                                                                                      | wt          | MUT | 1  | 1 | 1  | 36 |
| 12NE<br>C | 22 | m | e  | NEC  | LCNEC                    | 2  | 0  | 0 | + | + | + | +++ | +  | +  | 53.9 | wt                                                                                      | wt          | MUT | 0  | 0 | 0  | 61 |
| 5NEC      | 53 | m | e  | NEC  | LCNEC                    | 3  | 3  | 0 | + | + | + | -   | +  | +  | 66.4 | na                                                                                      | na          | na  | 0  | 1 | 1  | 10 |
| 19NE<br>C | 76 | m | e  | NEC  | LCNEC                    | 4b | 0  | 0 | + | + | + | +++ | -  | +  | 73.2 | wt                                                                                      | p.Arg172Thr | MUT | 1  | 1 | 1  | 22 |
| 16NE<br>C | 48 | m | mx | NEC  | LCNEC                    | 4b | 0  | 0 | + | + | + | +++ | -  | +  | 73.7 | wt                                                                                      | p.Arg172Thr | MUT | 0  | 0 | 0  | 58 |
| 3NEC      | 79 | m | e  | NEC  | LCNEC                    | 4b | 0  | 0 | + | + | + | +++ | -  | na | na   | na                                                                                      | na          | na  | 1  | 1 | 1  | 27 |
| 1NEC      | 74 | m | e  | NEC  | mixed<br>NEC+ADC<br>*    | 4b | 0  | 0 | + | + | + | +++ | na | +  | 56.7 | na                                                                                      | wt          | MUT | na | 1 | 0  | 0  |
| 15NE<br>C | 63 | m | e  | NEC  | mixed<br>NEC+ADC<br>**   | 4b | 0  | 0 | + | + | + | -   | +  | +  | 65.6 | wt                                                                                      | wt          | na  | 1  | 1 | 0  | 19 |
| 8NEC      | 72 | m | fr | NEC  | mixed<br>NEC+NKS<br>CC** | 4b | 0  | 0 | - | / | / | +++ | -  | +  | 55.8 | BIALLELIC<br>LOSS<br>SMARCB1<br>MONOAL-<br>LELIC LOSS<br>22q                            | wt          | wt  | 0  | 1 | 1  | 19 |
| 9NEC      | 42 | f | e  | NEC  | SCNEC                    | 4b | 0  | 0 | + | + | + | -   | -  | +  | 29.9 | wt                                                                                      | wt          | wt  | 0  | 0 | 1  | 29 |
| 17NE<br>C | 73 | m | e  | NEC  | SCNEC                    | 4b | 0  | 0 | + | + | + | +++ | -  | +  | 62.6 | wt                                                                                      | wt          | wt  | 0  | 0 | 0  | 57 |
| 18NE<br>C | 80 | m | e  | NEC  | SCNEC                    | 4b | 0  | 1 | + | + | + | -   | na | +  | 66.1 | wt                                                                                      | wt          | na  | na | 1 | na | na |
| 4NEC      | 44 | m | e  | NEC  | SCNEC                    | 4a | 0  | 0 | + | + | + | -   | +  | +  | 71.5 | wt                                                                                      | wt          | MUT | nv | 1 | 1  | 12 |
| 25NU<br>C | 74 | f | e  | SNUC | SNUC                     | 4a | 0  | 0 | + | + | + | +   | +  | +  | 48.5 | wt                                                                                      | wt          | na  | 0  | 0 | 0  | 59 |
| 35NU<br>C | 48 | f | e  | SNUC | SNUC                     | 4b | 0  | 0 | + | + | + | +++ | +  | +  | 56.1 | wt                                                                                      | wt          | na  | 0  | 0 | 0  | 56 |

|           |    |   |    |      |      |    |   |   |   |   |   |     |    |    |      |    |             |     |   |   |   |     |
|-----------|----|---|----|------|------|----|---|---|---|---|---|-----|----|----|------|----|-------------|-----|---|---|---|-----|
| 4SNU<br>C | 77 | f | e  | SNUC | SNUC | 4b | 0 | 0 | + | + | + | -   | +  | +  | 62.5 | wt | p.Arg172Ser | na  | 1 | 0 | 1 | 17  |
| 1SNU<br>C | 63 | m | e  | SNUC | SNUC | 4a | 0 | 0 | + | - | - | -   | -  | +  | 61.1 | wt | wt          | wt  | 0 | 0 | 0 | 126 |
| 7SNU<br>C | 63 | m | e  | SNUC | SNUC | 4b | 0 | 0 | + | + | + | +++ | na | +  | 73.5 | wt | p.Arg172Ser | MUT | 1 | 0 | 1 | 11  |
| 6SNU<br>C | 53 | m | mx | SNUC | SNUC | 4a | 0 | 0 | + | + | + | -   | +  | na | na   | na | na          | na  | 1 | 1 | 1 | 23  |

f=female; m=male; e=ethmoidal sinus; mx=maxillary sinus; fr=frontal sinus; s=sphenoidal sinus; SCC=squamocellular carcinoma; NEC=neuroendocrine carcinoma; SNUC=sinonasal undifferentiated carcinoma; NKSCC=non keratinizing SCC; KSCC= keratinizing SCC; LCNEC=large cell NEC; SCNEC=small cell NEC; ADC=adenocarcinomas (intestinal type); na=not available; +=presence; -=absence; +++=accumulation; wt=wild-type; MUT=presence of at least 1 mutation; 1=yes/died; 0=no/alive; \*SCNEC; \*\*LCNEC; \*\*\* basaloid SCC; \*\*\*\* spindle cell SCC.

**Table S2.** Immunohistochemistry primary antibody list.

| <b>Primary Antibody</b>   | <b>Clone</b>    | <b>Working Solution</b> | <b>Manufacturer</b> |
|---------------------------|-----------------|-------------------------|---------------------|
| mouse anti-Pan Keratin    | AE1-AE3 & PCK26 | pure                    | Roche               |
| mouse anti-Chromogranin A | LK2H10          | pure                    | Roche               |
| mouse anti-CD45           | RP2/18          | pure                    | Roche               |
| mouse anti-Ki67           | Mib-1           | 1/100                   | Dako                |
| rabbit anti-NSE           | MRQ-55          | pure                    | Roche               |
| rabbit anti-NUT           | C52B1           | 1/100                   | Cell Signaling      |
| mouse anti-p63            | 4A4             | pure                    | Roche               |
| mouse anti-p40            | BC28            | pure                    | Roche               |
| rat anti-Serotonin        | YC5/45          | 1/100                   | Serotec             |
| rabbit anti-Synaptophysin | SP11            | pure                    | Roche               |
| rabbit anti-S100          | SP127           | pure                    | Roche               |
| mouse anti-INI1/SMARCB1   | MRQ-27          | 1月-50                   | Cell Marque         |
| anti-BRG1/SMARCA4         | EPR 3912        | 1/100                   | Abcam               |
| rabbit anti-SMARCA2       | -               | 1/400                   | Sigma-Aldrich       |
| mouse anti-p53            | D07             | pure                    | Roche               |
| mouse anti-RB             | G3-245, BD      | 1/100                   | Pharmingen          |
| rabbit anti-ARID1A        | -               | 1/100                   | Sigma Aldrich       |

**Table S3. NGS results.**

[illegible]

|       |      |            |     |    |    |                    |    |    |    |    |    |      |
|-------|------|------------|-----|----|----|--------------------|----|----|----|----|----|------|
| 22SCC | SCC  | WT         | 653 | WT | WT | WT                 | WT | WT | WT | WT | WT | 61.4 |
| 13SCC | SCC  | WT         | 693 | WT | WT | WT                 | WT | WT | WT | WT | WT | 51.3 |
| 24SCC | SCC  | WT         | 776 | WT | WT | WT                 | WT | WT | WT | WT | WT | 77.3 |
| 2SCC  | SCC  | WT         | 777 | WT | WT | WT                 | WT | WT | WT | WT | WT | 40.2 |
| 34SCC | SCC  | WT         | 811 | WT | WT | WT                 | WT | WT | WT | WT | WT | 77.4 |
| 10SCC | SCC  | WT         | 977 | WT | WT | WT                 | WT | WT | WT | WT | WT | 23.5 |
| 7SNUC | SNUC | <b>MUT</b> | 752 | WT | WT | p.Arg172Ser<br>27% | WT | WT | WT | WT | WT | 73.5 |
| 4SNUC | SNUC | <b>MUT</b> | 758 | WT | WT | p.Arg172Ser<br>93% | WT | WT | WT | WT | WT | 62.5 |
| 1SNUC | SNUC | WT         | 618 | WT | WT | WT                 | WT | WT | WT | WT | WT | 61.1 |

\* BRAF, PDGFRA, NRAS, AKT1, ALK, ERBB3, ESR1, FOXL2, GNA11, GNAQ, IDH1, MET, RAF1, RET, ERBB2. Orange tables represent Uncertain Significance.

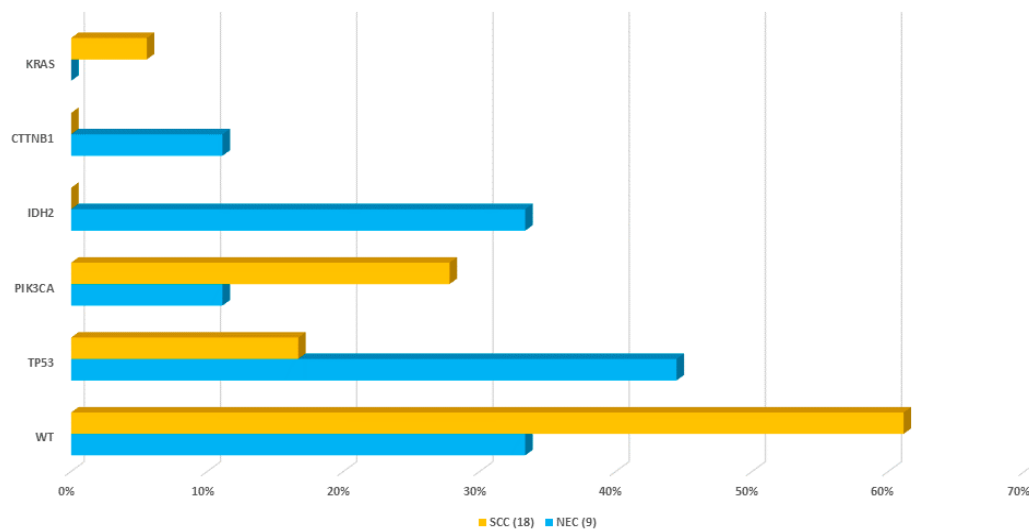

**Figure S1.** Distribution of pathogenic variants in SCC vs NEC.

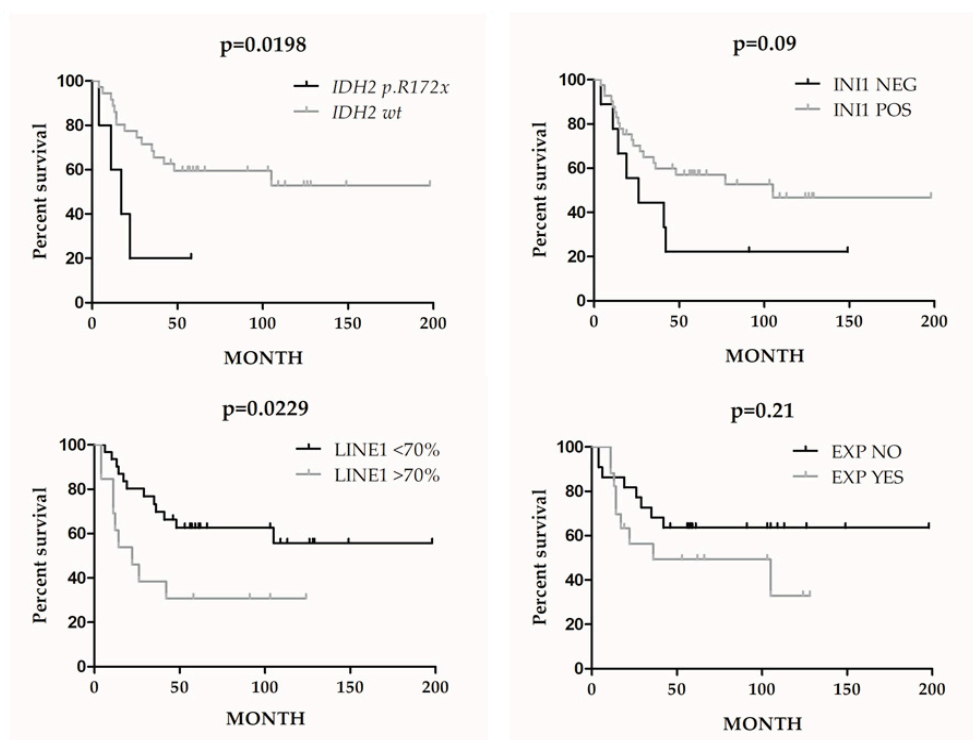

**Figure S2.** Univariable Survival Analyses according to INI1, IDH2, LINE-1 status and professional exposure.
